# Supplementary material for: KLF4 is required for suppression of histamine synthesis by polyamines during bone marrow-derived mast cell differentiation
Source: PubMed Central journal article supplement (PMC7043748; doi:10.1371/journal.pone.0229744), 2020-02-26

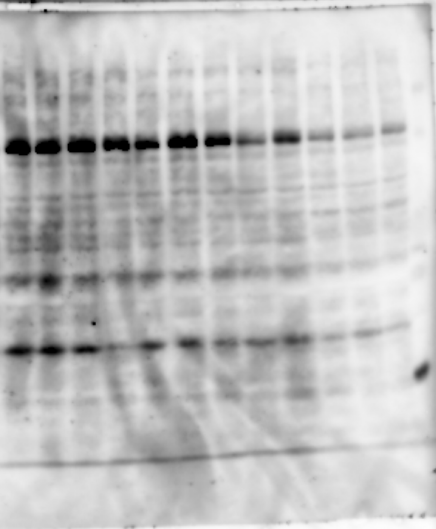

Supplement: pone.0229744.s001.pdf [file pone.0229744.s001.pdf]
