# Supplementary material for: KLF4 is required for suppression of histamine synthesis by polyamines during bone marrow-derived mast cell differentiation
Source: PubMed Central journal article supplement (PMC7043748; doi:10.1371/journal.pone.0229744), 2020-02-26
Supplement: pone.0229744.s002.pdf [file pone.0229744.s002.pdf]

1. The first part of the document discusses the importance of maintaining accurate records of all transactions. It emphasizes that proper record-keeping is essential for the integrity of the financial system and for the ability to detect and prevent fraud. The text notes that without reliable records, it would be difficult to track the flow of funds and identify any irregularities.

2. The second part of the document outlines the various methods used to collect and analyze data. It describes the process of gathering information from different sources, such as bank statements, receipts, and interviews. The analysis involves comparing the data to identify patterns and anomalies that may indicate suspicious activity. The document stresses the need for a systematic and thorough approach to data collection and analysis.

3. The third part of the document discusses the challenges faced in the process of data collection and analysis. It highlights the difficulty of obtaining complete and accurate information, particularly in cases where records are incomplete or where there is a high volume of data. The text also notes the importance of ensuring the confidentiality and security of the data being collected and analyzed.

4. The fourth part of the document provides a summary of the key findings and conclusions. It reiterates the importance of maintaining accurate records and the need for a systematic approach to data collection and analysis. The document concludes by emphasizing the role of the financial system in maintaining the integrity of the economy and the need for continued vigilance in detecting and preventing fraud.
