# Supplementary material for: KLF4 is required for suppression of histamine synthesis by polyamines during bone marrow-derived mast cell differentiation
Source: PubMed Central journal article supplement (PMC7043748; doi:10.1371/journal.pone.0229744), 2020-02-26
Supplement: pone.0229744.s003.pdf [file pone.0229744.s003.pdf]

## Supporting Information

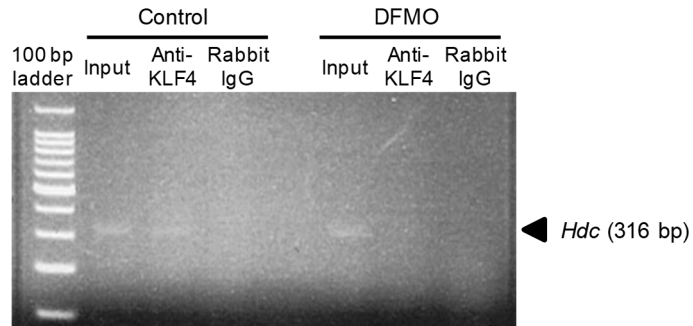

**Fig S3. Chromatin immunoprecipitation assay during BMDC differentiation in the absence or presence of DFMO.** Cells ( $5 \times 10^6$  cells) on day 14 during BMDC differentiation fixed with 1% formaldehyde and used for ChIP assay. ChIP assays were performed using Simple ChIP<sup>®</sup> Enzymatic IP Kit (Cell signaling) following manufacture's protocol. Antibody, GCLF (H-180) (sc-20691; Santa Cruz) were used for immunoprecipitation. PCR was performed using the specific primer pairs of *Hdc* promoter; forward, 5'-TGG CAA TTC TTC CCC CTT ACG-3', reverse, 5'-GCT CCT GCC CTG GCT TCT CTA T-3'.
