# Supplementary material for: KLF4 is required for suppression of histamine synthesis by polyamines during bone marrow-derived mast cell differentiation
Source: PubMed Central journal article supplement (PMC7043748; doi:10.1371/journal.pone.0229744), 2020-02-26
Supplement: pone.0229744.s004.pdf [file pone.0229744.s004.pdf]

## Supporting Information

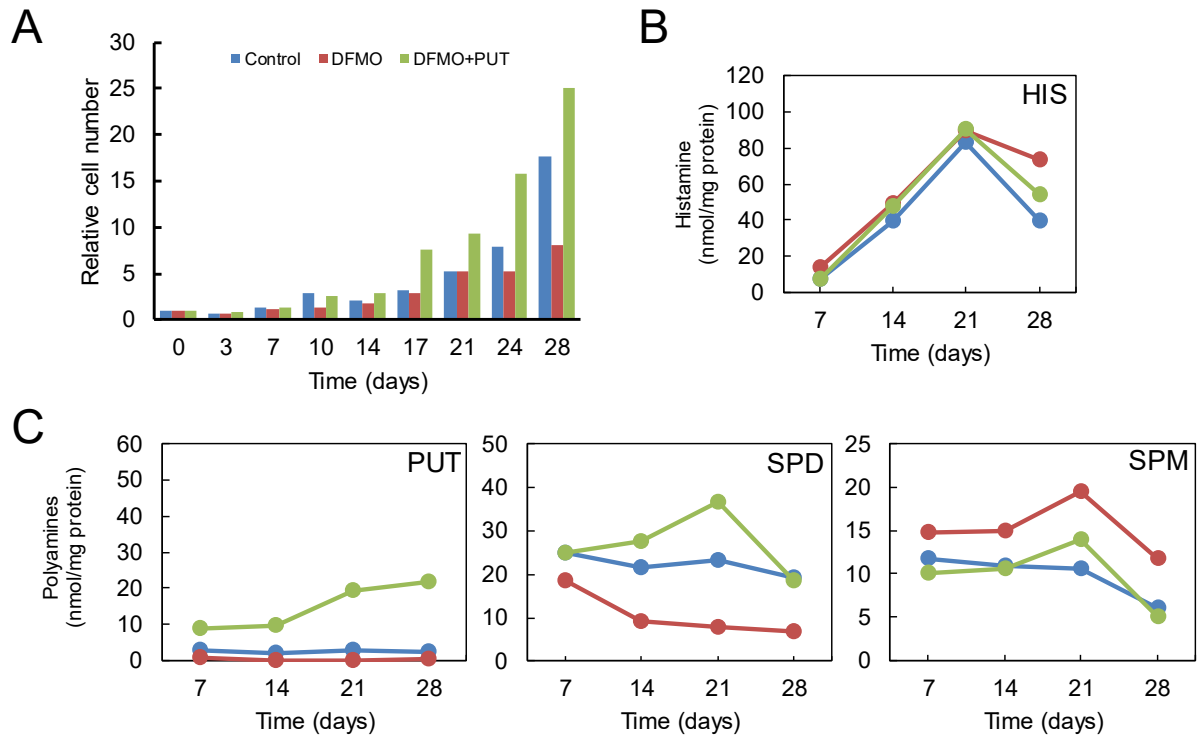

**Fig S4. Cell number and intracellular amines in BMDCs in the absence or presence of DFMO and putrescine.** (A) Cells were cultured with 0.1 mM DFMO and 0.1 mM putrescine (PUT) treatment from day 3. The relative cell number on day 0 is shown as 1,  $n = 2$  duplicates. During BMDC differentiation, cells on day 7, 14, 21, and 28 were used for analysis of intracellular histamine (B) and polyamines (C) by HPLC. Mean was shown,  $n = 2$  duplicates.
